1 **Pharmacological intervention of the FGF-PTH axis as a potential therapeutic for**  
2 **craniofacial ciliopathies**

3 Christian Louis Bonatto Paese<sup>1,3\*</sup>, Ching-Fang Chang<sup>1,3</sup>, Daniela Kristeková<sup>4,5</sup>, Samantha A. Brugmann<sup>1,2,3\*</sup>

4 <sup>1</sup>Division of Developmental Biology, Cincinnati Children's Hospital Medical Center, Cincinnati, OH USA

5 <sup>2</sup>Division of Plastic Surgery, Department of Surgery, Cincinnati Children's Hospital Medical Center, Cincinnati, OH USA

6 <sup>3</sup>Department of Pediatrics, University of Cincinnati College of Medicine, Cincinnati, OH, USA.

7 <sup>4</sup>Laboratory of Molecular Morphogenesis, Institute of Animal Physiology and Genetics, v.v.i., Czech Academy of Sciences, Brno  
8 602 00, Czech Republic

9 <sup>5</sup>Department of Experimental Biology, Faculty of Science, Masaryk University, Brno 625 00, Czech Republic

10

11

12 \*co-Corresponding Authors: [samantha.brugmann@cchmc.org](mailto:samantha.brugmann@cchmc.org), [christian.bonattopaese@cchmc.org](mailto:christian.bonattopaese@cchmc.org)

13

14 Keywords: Primary cilia, ciliopathies, FGF, C2cd3, micrognathia, *talpid*<sup>2</sup>

15

16 **Summary Statement**

17 Treatment options for ciliopathic phenotypes are very limited. Using an avian model, we report a novel  
18 molecular mechanism and potential therapeutic treatment for ciliopathic micrognathia.

19

20

21 **Abstract**

22 Ciliopathies represent a disease class characterized by a broad range of phenotypes including polycystic  
23 kidneys and skeletal anomalies. Ciliopathic skeletal phenotypes are among the most common and most  
24 difficult to treat due to a poor understanding of the pathological mechanisms leading to disease. Using an  
25 avian model (*talpid<sup>2</sup>*) for a human ciliopathy with skeletal anomalies (Orofaciodigital syndrome 14), we  
26 identified disruptions in the FGF23-PTH axis that resulted in reduced calcium uptake in the developing  
27 mandible and subsequent micrognathia. While pharmacological intervention with the FDA-approved pan-  
28 FGFR inhibitor AZD4547 alone rescued expression of the FGF target *Sprouty2*, it did not significantly  
29 rescue micrognathia. In contrast, treatment with a cocktail of AZD4547 and Teriparatide acetate, a PTH  
30 agonist and FDA-approved treatment for osteoporosis, resulted in a molecular, cellular, and phenotypic  
31 rescue of ciliopathic micrognathia in *talpid<sup>2</sup>* mutants. Together, these data provide novel insight into  
32 pathological molecular mechanisms associated with ciliopathic skeletal phenotypes and a potential  
33 therapeutic strategy for a pleiotropic disease class with limited to no treatment options.

34

35

36

37

38

39

40

## 41 **Introduction**

42 Ciliopathies comprise a growing class of disorders caused by structural or functional disruptions to primary  
43 cilia (Goetz and Anderson, 2010; Plotnikova et al., 2009; Reiter and Leroux, 2017). To date, there are  
44 approximately 35 reported ciliopathies, 180 ciliopathy-associated genes, and 250 additional candidate  
45 genes (Reiter and Leroux, 2017). Ciliopathies are difficult to treat because they are pleiotropic disorders  
46 frequently manifesting in neurological, olfactory, auditory, respiratory, reproductive, excretory, and skeletal  
47 defects (Goetz and Anderson, 2010; Waters and Beales, 2011). Establishing cellular and molecular  
48 etiologies for ciliopathic phenotypes is particularly important since most ciliopathies are life-threatening  
49 diseases with limited to no treatment options (Adel Al-Lami et al., 2016).

50 Ciliopathic skeletal pathologies are among the most difficult of the ciliopathic phenotypes to treat for several  
51 reasons. First, these patients frequently have a very limited supply of healthy bone amenable for  
52 autograft/allograft treatment. And, even in patients with a supply of healthy bone, grafts frequently suffer  
53 from poor efficacy and substantial rejection rates (Holloway et al., 2014; Kahn, 2014). Second, current  
54 therapies geared towards inducing bone regeneration (i.e., recombinant Bone Morphogenic Protein (BMP)  
55 delivery), likely require functional cilia for signal transduction and have dangerous off-targets (Holloway et  
56 al., 2014). Finally, since very little is known regarding the cellular and molecular mechanisms that  
57 contribute to bone dysplasia in ciliopathic patients, generating pharmacological options to treat these  
58 conditions has not been possible.

59 One approach geared towards generating therapeutic strategies for treating ciliopathies is gaining a deeper  
60 understanding of molecular mechanisms of cilia-dependent signal transduction. The Hedgehog (Hh)  
61 pathway is perhaps the most closely linked and extensively studied pathway relative to ciliary-dependent  
62 signal transduction (Briscoe and Therond, 2013; Corbit et al., 2005; Sasai and Briscoe, 2012). Furthermore,

63 the Hh pathway has proven to be very amenable to pharmacological intervention (Lin and Matsui, 2012;  
64 Scales and de Sauvage, 2009). Despite these promising opportunities, targeting Hh for the treatment of  
65 skeletal phenotypes is problematic due to variable Hh pathway readouts across tissues (i.e., in ciliopathies,  
66 some tissues experience a loss of Hh signaling while others experience a gain of Hh signaling) and a lack  
67 of Hh-mediated signaling during cellular processes most impacted in skeletal ciliopathies.

68 Several other pathways essential for skeletogenesis have been purported to utilize the cilium for signal  
69 transduction (Horner and Caspary, 2011; Kawata et al., 2021; Kunova Bosakova et al., 2019; Kunova  
70 Bosakova et al., 2018; Neugebauer et al., 2009; Wallingford and Mitchell, 2011; Yuan et al., 2019). The  
71 Fibroblast Growth Factors (FGF) pathway plays a major role in skeletogenesis, and mutations in certain  
72 ciliary proteins result in ectopic expression of genes within the FGF pathway (Kunova Bosakova et al.,  
73 2019; Kunova Bosakova et al., 2018; Mina et al., 2007; Tabler et al., 2013; Xie et al., 2020). Moreover,  
74 conditions associated with gain-of-function FGF mutations result in phenotypes reminiscent of skeletogenic  
75 ciliopathies including decreased bone mass and micrognathia (Kunova Bosakova et al., 2018; Motch  
76 Perrine et al., 2019; Zhou et al., 2013). Fgf23, a member of the endocrine subfamily of FGF ligands, is  
77 essential for bone homeostasis. Expressed in osteocytes, Fgf23 systemically interacts with parathyroid  
78 hormone (PTH) to control both bone mineralization and calcium levels throughout the body (Blau and  
79 Collins, 2015; Grau et al., 2020; Lu and Feng, 2011; Takashi et al., 2021). Misexpression of Fgf23 and PTH  
80 result in impaired bone mineralization and osteoblastic dysfunction, respectively (Iwasaki-Ishizuka et al.,  
81 2005; Lu and Feng, 2011). Interestingly, the Fgf23-PTH axis relies heavily on proper kidney function for  
82 propagation, as Fgf23 signaling induces the secretion of active Vitamin D (1,25-D3) from the kidney, which  
83 subsequently influences Ca<sup>2+</sup> levels (Blau and Collins, 2015; Grau et al., 2020; Lu and Feng, 2011; Takashi  
84 et al., 2021). Although the impact of impaired FGF23-PTH signaling on bone development has been  
85 described, its correlation with skeletal phenotypes observed in ciliopathic mutants has yet to be explored.

86 Our previous work exploring the etiology of ciliopathic skeletal phenotypes utilized a *bona fide* avian  
87 ciliopathic model called *talpid<sup>2</sup>* (*ta<sup>2</sup>*) (Abbott et al., 1959; Abbott et al., 1960). *ta<sup>2</sup>* embryos phenocopy the  
88 human skeletal ciliopathy Oral-facial-digital syndrome 14 (OFD14), presenting with micrognathia,  
89 hypoglossia, cleft lip/palate, hypoplastic cerebellar vermis, polydactyly, and polycystic kidneys. Genetically,  
90 just like human OFD14, *ta<sup>2</sup>* is caused by a mutation in the basal body protein, C2 Domain Containing 3  
91 Centriole Elongation Regulator (C2CD3) (Chang et al., 2014). Our previous work identified impaired  
92 osteoblast maturation coupled with excessive osteoclast-mediated bone remodeling as the pathological  
93 mechanism responsible for ciliopathic micrognathia (Bonatto Paese et al., 2021). Interestingly, this  
94 mechanism is like that of osteoporosis, for which there are several pharmacological treatments.

95 Herein we propose a novel dual-pronged approach toward alleviating skeletal phenotypes by targeting both  
96 the molecular and cellular processes impacted during ciliopathic skeletogenesis. Our data reveal  
97 disruptions in FGF signaling, specifically within the FGF23-PTH axis in *ta<sup>2</sup>* embryos. This molecular profile  
98 correlates with reduced calcium uptake in the developing mandible and subsequent micrognathia.  
99 Treatment with a cocktail of AZD4547- a pan FGFR-antagonist and Teriparatide Acetate- an osteoporosis  
100 drug and PTH-agonist resulted in reduced serum Ca<sup>2+</sup>, increased mineralization, and increased mandibular  
101 length in *ta<sup>2</sup>* embryos. Together, our data suggest that a targeted approach modulating impaired FGF  
102 signaling and excessive bone degradation in ciliopathies, like OFD14, is effective in alleviating ciliopathic  
103 skeletal phenotypes.

104

## 105 **Results**

### 106 **Ciliopathic micrognathia correlates with impaired signaling through the FGF23-PTH axis**

107 Like several ciliopathic models, *ta<sup>2</sup>* embryos present with micrognathia and polycystic kidneys. Alizarin Red  
108 staining confirmed decreased bone mineralization within *ta<sup>2</sup>* mandibles. Transverse sections of HH39  
109 mandibles revealed that *ta<sup>2</sup>* samples contained less calcium than stage-matched controls (**Fig. 1A, B**).  
110 Frontal sections through HH39 kidneys revealed several cysts within the developing *ta<sup>2</sup>* kidney when  
111 compared to the control (**Fig. 1C, D**). Based on the presentation of these two phenotypes, we hypothesized  
112 that the FGF23-PTH axis was impaired in *ta<sup>2</sup>* embryos. *FGF23* is expressed by osteocytes and osteoblasts  
113 and interacts locally with its obligatory receptor *KLOTHO* and systemically with the parathyroid hormone  
114 (*PTH*), to regulate bone mineralization and calcium metabolism. These endocrine factors induce the  
115 secretion of Vitamin D from the kidney. In normal development, vitamin D induces calcium uptake from the  
116 serum into bone (**Fig. 1E**). As per our hypothesis, impaired bone mineralization in the *ta<sup>2</sup>* embryos could be  
117 due to an aberrant secretion of *FGF23* and *PTH* and the polycystic phenotype could result in decreased  
118 vitamin D production, leading to decreased calcium uptake by the bone and misregulation of *FGF23* and  
119 *PTH* expression systemically (**Fig. 1E'**). To test our hypothesis, we examined the expression of genes  
120 within the FGF23/PTH axis in HH39 control and *ta<sup>2</sup>* kidneys and mandibles (**Fig. 1F-K**). RNAscope *in situ*  
121 hybridization showed that *KLOTHO* and *PTH* were reduced in *ta<sup>2</sup>* when compared to the control kidney  
122 (**Fig. 1F, G**). Concurrently, *FGF23* was significantly upregulated, and *PTH* was significantly downregulated  
123 when compared to control mandibles (**Fig. 1H-K**). qRT-PCR analysis confirmed *FGF23* and *PTH* were  
124 misregulated in *ta<sup>2</sup>* mandibles (**Fig. 1L**). The increase in *FGF23* and decrease in *PTH* expression strongly  
125 suggested aberrant calcium metabolism in *ta<sup>2</sup>* mutants. High-performance liquid chromatography (HPLC)  
126 for mineral contents revealed serum calcium was significantly upregulated in *ta<sup>2</sup>* embryos relative to  
127 controls (**Fig. 1M**). Taken together, our results revealed an imbalance in the FGF23/PTH axis which was  
128 accompanied by reduced calcium uptake in the mandible and increased calcium in the serum of *ta<sup>2</sup>*  
129 embryos. Based on these data, we next explored pharmacological intervention of FGF and PTH activity in  
130 *ta<sup>2</sup>* embryos.

131

## 132 **Modulation of the FGF pathway alone does not alleviate ciliopathic micrognathia**

133 FGF signaling plays a crucial role in mandibular development (Mina et al., 2007; Takashi et al., 2021; Xie et  
134 al., 2020). The master regulator of skeletal development *RUNX2* induces the expression of *FGFR2*, and  
135 this interaction is responsible for osteoblast proliferation (Kawane et al., 2018). Further, it has been shown  
136 that *FGF23* paracrine activity signals exclusively via *FGFR1*, which modulates *FGF23* expression in  
137 osteocytes (Takashi et al., 2021; Xiao et al., 2014). We evaluated the expression of *FGFR1* and *FGFR2*  
138 during osteoblast maturation (HH34) and bone remodeling (HH39). qRT-PCR revealed a significant  
139 upregulation of *FGFR2* and *FGFR1* expression and reduced expression of *SPROUTY2* (*SPRY2*), a  
140 negative regulator of FGF activity, in *ta<sup>2</sup>* embryos at HH34 and HH39 (**Fig. 2A**). Considering these data, we  
141 attempted to rescue the micrognathic phenotype in *ta<sup>2</sup>* embryos by pharmacologically inhibiting FGF  
142 activity. AZD4547 is an FDA-approved, selective tyrosine kinase inhibitor that targets *FGFR1*, *FGFR2*, and  
143 *FGFR3* (**Fig. 2B**). To determine an effective drug dosage in HH33 embryos a dose-response curve was  
144 generated treating embryos with 10 $\mu$ l of either 1 or 5 $\mu$ M AZD4547. (**Fig. S1A-C**). Based on survival rates,  
145 10 $\mu$ l of 1 $\mu$ M AZD4547 was utilized and delivered below the chorioallantoic membrane adjacent to the  
146 developing mandible (**Fig. 2C**). At the morphological level, we observed no significant changes between  
147 non-injected and injected *ta<sup>2</sup>* embryos (**Fig. 2D-G**). To determine the efficacy of AZD4547 treatment,  
148 expression of the FGF target *SPRY2* was analyzed via qRT-PCR of HH34 MNPs. Interestingly, despite a  
149 failure to rescue mandibular length, AZD4547 treatment did rescue *SPRY2* expression to that of control  
150 embryos (**Fig. 2H**).

151 Our previous data revealed that increased *FGF23* expression was accompanied by decreased *PTH*  
152 expression (**Fig. 1**). *PTH* is crucial for the maintenance of calcium homeostasis in the body, acting directly

153 in bone formation and resorption (Silva and Bilezikian, 2015). Thus, we next tested the potential of the PTH  
154 agonist Teriparatide Acetate to rescue ciliopathic micrognathia, using the same experimental design as  
155 previously used for AZD4547 delivery (**Fig S1A, B**). To determine an effective dosage of Teriparatide  
156 Acetate in HH33 embryos, a dose-response curve was generated treating embryos with 10 $\mu$ l of either 1 or  
157 10uM of Teriparatide Acetate. Based on survival rates, 10 $\mu$ l of 10uM of Teriparatide Acetate was utilized  
158 and delivered as previously described (**Fig. S1B, C**). The mandibular length was not significantly increased  
159 in *ta*<sup>2</sup> embryos treated with Teriparatide Acetate alone (**Fig. S2C-F**). Since neither treatment alone  
160 significantly improved mandibular length, we next tested a combinatorial treatment.

161

### 162 **AZTeri injection is effective in alleviating ciliopathic micrognathia in *ta*<sup>2</sup> embryos**

163 Given the pleiotropic nature of ciliopathies and the combinatorial cellular mechanism associated with  
164 ciliopathic micrognathia, we tested if treating *ta*<sup>2</sup> embryos with a cocktail of AZD4547 and Teriparatide  
165 Acetate (referred to as AZTeri from here on out) could yield a significant improvement of ciliopathic  
166 micrognathia. The AZTeri cocktail was generated using previously established dosages of individualized  
167 AZD and Teriparatide Acetate treatments (1uM). HH33 embryos were treated with 10ul AZTeri and  
168 harvested 24h later at HH34 to assess the efficacy of treatment (**Fig. 3A**). *SPRY2* expression was  
169 expanded in AZTeri treated *ta*<sup>2</sup> embryos, relative to untreated *ta*<sup>2</sup> embryos (**Fig. 3B-D**). qRT-PCR analysis  
170 validated and quantified these data and revealed that *SPRY2* expression in AZTeri treated *ta*<sup>2</sup> embryos  
171 was not significantly different from that observed in untreated controls (**Fig. 3E**). Western Blot analysis  
172 further revealed that AZTeri treatment was effective in downregulating MAPK cascade activity. While there  
173 was no change in total Erk levels between untreated and treated control embryos (**Fig. S3**), phospho-ERK



174 levels were significantly downregulated in AZTeri treated *ta*<sup>2</sup> embryos when compared to the untreated *ta*<sup>2</sup>  
175 group (**Fig. 3F**).

176 To test the potential of AZTeri as a therapeutic agent for skeletal ciliopathies, HH33 embryos were treated  
177 with 10µl of AZTeri and harvested at HH39. AZTeri-treated *ta*<sup>2</sup> embryos demonstrated a significant  
178 increase in mandibular length when compared to untreated *ta*<sup>2</sup> embryos (**Fig. 4A-D**). Transverse sections  
179 through HH39 mandibles revealed a robust amount of calcium incorporated into the mandible of controls  
180 relative to *ta*<sup>2</sup> mandibles (**Fig. 4E, F**). Interestingly, AZTeri treated *ta*<sup>2</sup> embryos showed a marked  
181 improvement in the amount of mandibular calcium pockets compared to the untreated *ta*<sup>2</sup> sections (**Fig.**  
182 **4G**). Measurements of the calcified area demonstrated that AZTeri treatment restored the amount of  
183 calcified tissues in *ta*<sup>2</sup> to that of control embryos (**Fig. 4H**). AZTeri-treated *ta*<sup>2</sup> embryos also had reduced  
184 bone remodeling, as assayed by tartrate-resistant acid phosphatase (TRAP) staining, when compared to  
185 the untreated *ta*<sup>2</sup> embryos (**Fig. 4I-L**). Moreover, HPLC analysis of AZTeri-treated *ta*<sup>2</sup> embryos further  
186 revealed that the increase of calcium and decrease of TRAP staining in the developing mandible correlated  
187 with decreased serum calcium levels (**Fig. 4I**). Finally, to confirm if PTH levels and osteoclast activity were  
188 indeed changed in the treated embryos, we performed RNAscope in situ hybridization in frontal sections of  
189 HH39 mandibles for *PTH* and *SPP1* transcripts. *PTH* expression was reduced, while *SPP1* expression was  
190 increased in *ta*<sup>2</sup> mandibles, relative to controls. AZTeri treatment resulted in increased *PTH* expression and  
191 reduced *SPP1* expression when compared to untreated *ta*<sup>2</sup> embryos (**Fig. 4N-S**), further suggesting that  
192 excessive bone remodeling is partially alleviated in treated embryos (**Fig. 4Q-S**). Taken together, these  
193 results demonstrated the potential of AZTeri treatment for ciliopathic micrognathia.

194

195 **Discussion**

196 Herein, we present a potential avenue for the pharmacological intervention of ciliopathic skeletal  
197 phenotypes. Utilizing the *ta<sup>2</sup>* avian mutant as a model for a human ciliopathy, we identified disruptions in  
198 the FGF23/PTH signaling axis concomitant with decreased bone mineralization and increased serum  
199 calcium. These data, in concert with our previous reports that excessive bone resorption contributed to  
200 ciliopathic micrognathia (Bonatto Paese et al., 2021), informed our hypothesis that treatment  
201 simultaneously targeting FGF signaling and bone resorption would rescue micrognathia in *ta<sup>2</sup>* embryos.  
202 These findings support a potential drug-based therapeutic option for human ciliopathy patients.

203 Avians are an exquisite model for pharmacological testing due to *in ovo* embryonic accessibility, low cost,  
204 and an abundant number of embryos (Zosen et al., 2021). Several drugs currently used in preclinical  
205 cancer trials or treatments were initially tested on avian embryos (Bueker and Platner, 1956; Karnofsky and  
206 Lacon, 1964; Kue et al., 2015; Ryley, 1968; Zuniga et al., 2003). While *in ovo* screens have provided a  
207 wealth of information on toxicity and off-target effects, the lack of avian models for human disease has  
208 prevented more robust usage of the egg as a tool for testing pharmacological agents in human health  
209 research.

210 The *talpid<sup>2</sup>* is perfectly suited for such studies. First, it phenocopies human ciliopathies on both a genetic  
211 and biochemical level and survives well into development. Second, since most ciliopathic models are early  
212 embryonic lethal, murine conditional knock-out models are commonly used to study molecular  
213 mechanisms. While this is effective in examining a ciliopathic insult on one tissue, it fails to consider the  
214 pleiotropic nature of ciliopathies as they present in human patients. As such, the *talpid<sup>2</sup>* represents a unique  
215 and powerful model that is not only easily accessible but also highly representative of a human ciliopathy  
216 (Bonatto Paese et al., 2021; Chang et al., 2014; Schock et al., 2015).

217 One of the most common skeletal phenotypes associated with ciliopathies is micrognathia. Micrognathia  
218 significantly impacts a patient's ability to breathe, eat and speak. Treatment options for micrognathia are  
219 limited. Surgical procedures, like distraction osteogenesis, are highly invasive and the poor quality of the  
220 bone in ciliopathy patients makes treatment like this less effective (Abramson et al., 2013; Breik et al.,  
221 2016; Holloway et al., 2014; Kahn, 2014; Perlyn et al., 2002; Tomonari et al., 2017). To eliminate the need  
222 for surgical intervention, pharmacological treatments for micrognathia have been explored. Drug treatments  
223 for osteoporosis were seen as strong candidates for treatment. Osteoporosis is broadly defined as “an  
224 imbalance between bone formation and bone resorption” (Bodenner et al., 2007). Mechanistically, this  
225 description is very similar to the pathology observed in the *ta<sup>2</sup>* mandibles (Bonatto Paese et al., 2021).  
226 Bisphosphonates represent potent inhibitors of bone resorption that are FDA approved for the treatment of  
227 osteoporosis. In an avian model, bisphosphonate treatment significantly elongated the mandible (Ealba et  
228 al., 2015). Despite the efficacy of bisphosphonate treatment in avians, treatment in humans has proven  
229 less effective and has been associated with the development of bisphosphonate-related osteonecrosis of  
230 the jaw (BRONJ) (Eckert et al., 2007; Rayman et al., 2009). Thus, additional experiments focusing on  
231 alternative pharmacological treatments for micrognathia are necessary.

232 Teriparatide Acetate (TA), a component of the AZTeri treatment used herein, represents another FDA-  
233 approved treatment for osteoporosis. TA effectively reduces bone resorption and has shown promising  
234 results in phase 4 trials (Leder, 2017). TA has been successfully used for the treatment of BRONJ (Chopra  
235 and Malhan, 2020; Dos Santos Ferreira et al., 2021; Kwon and Kim, 2016; Sim et al., 2020; Yu and Su,  
236 2020), and reduced serum calcium levels and improved bone integrity in osteoporosis and  
237 hypoparathyroidism patients (Gutierrez-Cerecedo et al., 2016; Satterwhite et al., 2010). Considering the  
238 variable efficacy and side effects in human patients, it will be important to carefully examine other

239 osteoporosis-approved drugs (Denosumab, etc.) for the treatment of ciliopathic skeletal phenotypes (Tsai  
240 et al., 2019).

241 In addition to targeting the cellular process of bone resorption with TA, we also hypothesized that treating  
242 excessive FGF activity would prove necessary for the treatment of micrognathia. Previous results revealed  
243 an association between ciliopathies and FGF syndromes, however; the association was specifically  
244 between FGF signaling and the onset of maxillary phenotypes, like high arched palate (Tabler et al., 2013).  
245 Mandibular ciliopathic phenotypes, on the other hand, have been more commonly associated with aberrant  
246 Hh or Wnt signaling (Elliott et al., 2018; Millington et al., 2017; Zhang et al., 2011). While much of the data  
247 on FGF and mandibular development focuses on an early patterning role of FGF8 (Mina et al., 2007;  
248 Shigetani et al., 2000; Terao et al., 2011; Zhou et al., 2013), FGF23 plays an important role later in skeletal  
249 development by modulating parathyroid hormone and calcium signaling (Blau and Collins, 2015; Lu and  
250 Feng, 2011). As Hh and Wnt signaling have numerous roles throughout the embryo at this stage of  
251 skeletogenesis, focusing specifically on FGF23 signaling may prove to be the most targeted mode of  
252 treatment for pleiotropic diseases, like ciliopathies, with skeletal phenotypes.

253 Calcium signaling plays a pivotal role during bone development, and depleted calcium uptake is the main  
254 cause of conditions such as osteoporosis and rickets (Monsen, 1989). There is no consensus as to if the  
255 primary cilium plays a major role in calcium signaling (Delaine-Smith et al., 2014; Delling et al., 2013;  
256 Delling et al., 2016; Hoey et al., 2012; Lee et al., 2015; Malone et al., 2007; Saternos et al., 2020), yet our  
257 results support a systemic role for cilia in the differentiation of osteoblasts (Bonatto Paese et al., 2021). It is  
258 possible that the role of cilia in calcium uptake may vary between tissues (e.g., node vs. osteoblast),  
259 temporally during development, or between chemosensory and mechanosensory cilia. More detailed  
260 experiments will need to be done to definitively determine the relationship between the cilium and calcium  
261 uptake in the developing mandible.

262 In summary, our work proposes a novel molecular mechanism and treatment strategy for ciliopathic  
263 micrognathia using a cocktail of FDA-approved drugs. While this treatment does not completely restore  
264 mandibular length to that of control embryos, it does significantly rescue the micrognathic phenotype. As a  
265 complete rescue of micrognathia may be optimistic at this time, a realistic goal for this treatment option is to  
266 restore the mandible to a length that alleviates the need for repeated, invasive surgeries and allows  
267 patients a better quality of life.

268

269

## 270 **Material and Methods**

### 271 Embryonic collection and genotyping

272 Fertilized control and *ta<sup>2</sup>* eggs were purchased from the University of California, Davis. Eggs were  
273 incubated at 38.8°C in a rocking incubator with humidity control. Staging followed the Hamburger-Hamilton  
274 staging system, and genotyping was performed as previously described (Bonatto Paese et al., 2021;  
275 Hamburger and Hamilton, 1951). Unless noted otherwise in the figure legend, every experiment utilized five  
276 embryos for each experimental group.

277

### 278 Skeletal staining

279 Samples were incubated in 0.005% Alizarin Red S (Sigma-Aldrich A5533) in 1% KOH for 3 hours at room  
280 temperature and cleared in 1% KOH. Once cleared, samples were incubated in Glycerol:KOH 1% (50:50)  
281 solution. For imaging and long-term storage, samples were kept in 100% glycerol. Stained specimens were  
282 imaged using a Leica M165 FC stereo microscope system.

283

#### 284 qRT-PCR

285 RNA was extracted using TRIzol reagent (Invitrogen) and cDNA was synthesized using SuperScript III  
286 (Invitrogen). HH39 mandibles were first frozen with liquid nitrogen and ground using a mortar and pestle to  
287 ensure homogenous extraction. SYBR Green Supermix (Bio-Rad) and a Quant6 Applied Biosystems qPCR  
288 machine were used to perform qRT-PCR. All the genes were normalized to GAPDH expression. Negative  
289 controls were performed by omitting the cDNA in the mixture. The level of expression for each gene was  
290 calculated using the  $2^{-\Delta\Delta Cq}$  method (Livak and Schmittgen, 2001). Unpaired one-tailed Student's t-test was  
291 used for statistical analysis.  $P < 0.05$  was determined to be significant.

292

#### 293 RNAScope *in situ* hybridization

294 RNAScope *in situ* hybridization was carried out as previously described (Bonatto Paese et al., 2021). The  
295 transcripts used in this study were as follow: *FGF23* (ACD - 1002831), *PTH* (ACD - 1003861), *SPP1* (ACD  
296 - 571601) and *SPRY2* (ACD - 1086991), were detected using the RNAScope Multiplex Fluorescent V2 kit  
297 per manufacturer's instructions. Both sections and wholemount samples were imaged using a Nikon A1  
298 LUN-V inverted microscope system.

299

#### 300 Embryonic treatment

301 Three mixes were utilized in this study: AZD4547 (Selleck Chem - S2801) was diluted to  $1\mu\text{M}$  in 4%  
302 DMSO+30% PEG 300+5% Tween 80+ddH<sub>2</sub>O. Teriparatide Acetate (Selleck Chem - P1033) was diluted to  
303  $1\mu\text{M}$  in ddH<sub>2</sub>O. AZTeri was a mix of  $1\mu\text{M}$  of AZD4547 and  $1\mu\text{M}$  of Teriparatide Acetate diluted in ddH<sub>2</sub>O.

304 Embryos were treated at HH33 embryos via applying 10 $\mu$ L of the drugs under the chorioallantoic  
305 membrane immediately adjacent to the mandible. Embryos were then incubated without shaking in the  
306 incubator. Wholemound heads were dissected at either HH34 or HH39 and processed for further analysis.

307

308 Analysis of serum calcium content

309 100 $\mu$ l of blood was collected from the vitelline vein of HH39 embryos was collected on ice with  
310 microcapillaries, weighted and sent for processing by the R. Marshall Wilson Mass Spectrometry facility at  
311 University of Cincinnati. Inductively Coupled Plasma - Mass Spectrometry with High Performance  
312 Liquid Chromatography (ICP-MS HPLC) was utilized.

313

314 Histological analysis

315 Hematoxylin and eosin (H&E) staining was performed using standard protocols. For calcium deposit  
316 analysis, 7 $\mu$ m transverse sections of HH39 mandibles were used with the Von Kossa Stain Kit (Calcium  
317 Stain) (Abcam - ab150687), following manufacturer instructions. TRAP staining was performed on 8  $\mu$ m  
318 thick transversal sections of undecalcified HH39 mandibles using the Acid Phosphatase Leukocyte (TRAP)  
319 kit (Sigma-Aldrich, 387A) following the manufacturer's protocol.

320

321 Western Blot

322 Embryos were injected at HH33, and mandibles were dissected at HH34 for processing. Collected tissue  
323 was sonicated in cold RIPA buffer (50 mM Tris-HCl, pH 7.4, 1% NP-40, 0.25% sodium deoxycholate, 150

324 mM NaCl, 1 mM EDTA) containing protease and phosphatase inhibitors (ThermoFisher 78440). The  
325 protein extract was collected after 10 minutes full-speed centrifugation at 4C. 20ug of protein from each  
326 embryo was used for Western blot, with the following primary and secondary antibodies: ERK1/2 (Cell  
327 Signaling Technology - 9101S, 1:1000), Phospho-p44/42 MAPK (ERK1/2) (Novus Biologicals NB110-  
328 96887, 1:1000), Vinculin (Santa Cruz Biotechnology sc-73614, 1:2000), IRDye® 800CW Donkey anti-  
329 Rabbit IgG (LICOR 926-32213, 1:2000), IRDye® 680RD Donkey anti-Mouse IgG (LICOR 925-68072,  
330 1:2000). Images were taken by LICOR Odyssey® DLx. Densitometry was done by ImageJ.

331

### 332 Statistical methods

333 Unpaired t-tests (two groups) or one-way ANOVA (three and four groups) were used in comparisons for  
334 statistical analysis between groups. It was considered significant when the two-tailed analysis were  $p < 0.05$ .

335

### 336 Acknowledgements

337 We would like to thank the University of California – Davis avian facility (Mary Delany, Jackie Pisenti and  
338 Kevin Bellido) for maintenance and husbandry of the *talpid<sup>2</sup>* colony. Technical assistance was given by Dr  
339 Matt Kofron for image acquisition and analysis (Confocal Imaging Core at Cincinnati Children's Hospital  
340 Medical Center) and Dr Julio Landero Figueroa for calcium serum analysis (University of Cincinnati - R.  
341 Marshall Wilson Mass Spectrometry facility). We are grateful for the Brugmann laboratory technical  
342 assistance and feedback. This study was funded by the National Institute of Dental and Craniofacial  
343 Research (R35 DE027557) and to S.A.B. and the Cincinnati Children's Hospital Medical Center internal  
344 grant for C.L.B.P. (Arnold W. Strauss Fellowship).



345

346 **Competing interests**

347 The authors declare no competing or financial interests.

348

349 **Author contributions**

350 Conceptualization: C.L.B.P and S.A.B.; Methodology: C.L.B.P., D. K., and C.F.C.; Validation: C.L.B.P.,  
351 C.F.C.; Formal analysis: C.L.B.P. and S.A.B.; Investigation: C.L.B.P., C.F.C., Resources: S.A.B.; Writing -  
352 original draft: C.L.B.P., C.F.C and S.A.B.; Writing - review & editing: C.L.B.P., C.F.C., S.A.B.; Visualization:  
353 C.L.B.P., D.K., C.F.C., S.A.B.; Supervision: S.A.B.; Project administration: S.A.B.; Funding acquisition:  
354 C.L.B.P. and S.A.B.

355

356

357

358

359

360

361

362

363

364 **REFERENCES**

- 365 **Abbott, U., Taylor, L. and Abplanalp, H.** (1959). A 2nd Talpid-like Mutation in the Fowl. In  
366 *Poultry Science*, vol. 38, pp. 1185-1185: Oxford Univ Press GREAT CLARENDON ST, OXFORD OX2 6DP,  
367 ENGLAND.
- 368 **Abbott, Ü., Taylor, L. W. and Abplanalp, H.** (1960). Studies with talpid2, an embryonic lethal of  
369 the fowl. *Journal of Heredity* **51**, 194-202.
- 370 **Abramson, Z. R., Susarla, S. M., Lawler, M. E., Peacock, Z. S., Troulis, M. J. and Kaban, L. B.**  
371 (2013). Effects of mandibular distraction osteogenesis on three-dimensional airway anatomy in children  
372 with congenital micrognathia. *J Oral Maxillofac Surg* **71**, 90-7.
- 373 **Adel Al-Lami, H., Barrell, W. B. and Liu, K. J.** (2016). Micrognathia in mouse models of  
374 ciliopathies. *Biochem Soc Trans* **44**, 1753-1759.
- 375 **Blau, J. E. and Collins, M. T.** (2015). The PTH-Vitamin D-FGF23 axis. *Rev Endocr Metab Disord* **16**,  
376 165-74.
- 377 **Bodenner, D., Redman, C. and Riggs, A.** (2007). Teriparatide in the management of  
378 osteoporosis. *Clin Interv Aging* **2**, 499-507.
- 379 **Bonato Paese, C. L., Brooks, E. C., Aarnio-Peterson, M. and Brugmann, S. A.** (2021). Ciliopathic  
380 micrognathia is caused by aberrant skeletal differentiation and remodeling. *Development* **148**.
- 381 **Breik, O., Umaphysivam, K., Tivey, D. and Anderson, P.** (2016). Feeding and reflux in children  
382 after mandibular distraction osteogenesis for micrognathia: A systematic review. *Int J Pediatr*  
383 *Otorhinolaryngol* **85**, 128-35.
- 384 **Briscoe, J. and Therond, P. P.** (2013). The mechanisms of Hedgehog signalling and its roles in  
385 development and disease. *Nat Rev Mol Cell Biol* **14**, 416-29.
- 386 **Bueker, E. D. and Platner, W. S.** (1956). Effect of cholinergic drugs on development of chick  
387 embryo. *Proc Soc Exp Biol Med* **91**, 539-43.
- 388 **Chang, C. F., Schock, E. N., O'Hare, E. A., Dodgson, J., Cheng, H. H., Muir, W. M., Edelmann, R.**  
389 **E., Delany, M. E. and Brugmann, S. A.** (2014). The cellular and molecular etiology of the craniofacial  
390 defects in the avian ciliopathic mutant talpid2. *Development* **141**, 3003-12.
- 391 **Chopra, K. and Malhan, N.** (2020). Teriparatide for the Treatment of Medication-Related  
392 Osteonecrosis of the Jaw. *Am J Ther* **28**, e469-e477.
- 393 **Corbit, K. C., Aanstad, P., Singla, V., Norman, A. R., Stainier, D. Y. and Reiter, J. F.** (2005).  
394 Vertebrate Smoothed functions at the primary cilium. *Nature* **437**, 1018-21.
- 395 **Delaine-Smith, R. M., Sittichokechaiwut, A. and Reilly, G. C.** (2014). Primary cilia respond to  
396 fluid shear stress and mediate flow-induced calcium deposition in osteoblasts. *FASEB J* **28**, 430-9.
- 397 **Delling, M., DeCaen, P. G., Doerner, J. F., Febvay, S. and Clapham, D. E.** (2013). Primary cilia are  
398 specialized calcium signalling organelles. *Nature* **504**, 311-4.
- 399 **Delling, M., Indzhukulian, A. A., Liu, X., Li, Y., Xie, T., Corey, D. P. and Clapham, D. E.** (2016).  
400 Primary cilia are not calcium-responsive mechanosensors. *Nature* **531**, 656-60.
- 401 **Dos Santos Ferreira, L., Abreu, L. G., Calderipe, C. B., Martins, M. D., Schuch, L. F. and**  
402 **Vasconcelos, A. C. U.** (2021). Is teriparatide therapy effective for medication-related osteonecrosis of  
403 the jaw? A systematic review and meta-analysis. *Osteoporos Int* **32**, 2449-2459.
- 404 **Ealba, E. L., Jheon, A. H., Hall, J., Curantz, C., Butcher, K. D. and Schneider, R. A.** (2015). Neural  
405 crest-mediated bone resorption is a determinant of species-specific jaw length. *Dev Biol* **408**, 151-63.

- 406 **Eckert, A. W., Maurer, P., Meyer, L., Kriwalsky, M. S., Rohrberg, R., Schneider, D., Bilkenroth,**  
407 **U. and Schubert, J.** (2007). Bisphosphonate-related jaw necrosis--severe complication in maxillofacial  
408 surgery. *Cancer Treat Rev* **33**, 58-63.
- 409 **Elliott, K. H., Millington, G. and Brugmann, S. A.** (2018). A novel role for cilia-dependent sonic  
410 hedgehog signaling during submandibular gland development. *Dev Dyn* **247**, 818-831.
- 411 **Goetz, S. C. and Anderson, K. V.** (2010). The primary cilium: a signalling centre during vertebrate  
412 development. *Nat Rev Genet* **11**, 331-44.
- 413 **Grau, L., Gitomer, B., McNair, B., Wolf, M., Harris, P., Brosnahan, G., Torres, V., Steinman, T.,**  
414 **Yu, A., Chapman, A. et al.** (2020). Interactions between FGF23 and Genotype in Autosomal Dominant  
415 Polycystic Kidney Disease. *Kidney360* **1**, 648-656.
- 416 **Gutierrez-Cerecedo, L. E., Vergara-Lopez, A., Rosas-Barrientos, J. V. and Guillen-Gonzalez, M.**  
417 **A.** (2016). [Reduction in requirements of oral calcium and 1-25 dihydroxy vitamin D in patients with  
418 post-surgical hypoparathyroidism treated with teriparatide (PTH1-34)]. *Gac Med Mex* **152**, 322-8.
- 419 **Hamburger, V. and Hamilton, H. L.** (1951). A series of normal stages in the development of the  
420 chick embryo. *J Morphol* **88**, 49-92.
- 421 **Hoey, D. A., Chen, J. C. and Jacobs, C. R.** (2012). The primary cilium as a novel extracellular  
422 sensor in bone. *Front Endocrinol (Lausanne)* **3**, 75.
- 423 **Holloway, J. L., Ma, H., Rai, R. and Burdick, J. A.** (2014). Modulating hydrogel crosslink density  
424 and degradation to control bone morphogenetic protein delivery and in vivo bone formation. *J Control*  
425 *Release* **191**, 63-70.
- 426 **Horner, V. L. and Caspary, T.** (2011). Disrupted dorsal neural tube BMP signaling in the cilia  
427 mutant *Arl13b* hnn stems from abnormal *Shh* signaling. *Dev Biol* **355**, 43-54.
- 428 **Iwasaki-Ishizuka, Y., Yamato, H., Nii-Kono, T., Kurokawa, K. and Fukagawa, M.** (2005).  
429 Downregulation of parathyroid hormone receptor gene expression and osteoblastic dysfunction  
430 associated with skeletal resistance to parathyroid hormone in a rat model of renal failure with low  
431 turnover bone. *Nephrol Dial Transplant* **20**, 1904-11.
- 432 **Kahn, M.** (2014). Can we safely target the WNT pathway? *Nat Rev Drug Discov* **13**, 513-32.
- 433 **Karnofsky, D. A. and Lacon, C. R.** (1964). Effects of drugs on the skeletal development of the  
434 chick embryo. *Clin Orthop Relat Res* **33**, 59-70.
- 435 **Kawane, T., Qin, X., Jiang, Q., Miyazaki, T., Komori, H., Yoshida, C. A., Matsuura-Kawata, V.,**  
436 **Sakane, C., Matsuo, Y., Nagai, K. et al.** (2018). Runx2 is required for the proliferation of osteoblast  
437 progenitors and induces proliferation by regulating *Fgfr2* and *Fgfr3*. *Sci Rep* **8**, 13551.
- 438 **Kawata, K., Narita, K., Washio, A., Kitamura, C., Nishihara, T., Kubota, S. and Takeda, S.** (2021).  
439 Odontoblast differentiation is regulated by an interplay between primary cilia and the canonical Wnt  
440 pathway. *Bone* **150**, 116001.
- 441 **Kue, C. S., Tan, K. Y., Lam, M. L. and Lee, H. B.** (2015). Chick embryo chorioallantoic membrane  
442 (CAM): an alternative predictive model in acute toxicological studies for anti-cancer drugs. *Exp Anim* **64**,  
443 129-38.
- 444 **Kunova Bosakova, M., Nita, A., Gregor, T., Varecha, M., Gudernova, I., Fafilek, B., Barta, T.,**  
445 **Basheer, N., Abraham, S. P., Balek, L. et al.** (2019). Fibroblast growth factor receptor influences primary  
446 cilium length through an interaction with intestinal cell kinase. *Proc Natl Acad Sci U S A* **116**, 4316-4325.
- 447 **Kunova Bosakova, M., Varecha, M., Hampl, M., Duran, I., Nita, A., Buchtova, M., Dosedelova,**  
448 **H., Machat, R., Xie, Y., Ni, Z. et al.** (2018). Regulation of ciliary function by fibroblast growth factor  
449 signaling identifies FGFR3-related disorders achondroplasia and thanatophoric dysplasia as ciliopathies.  
450 *Hum Mol Genet* **27**, 1093-1105.
- 451 **Kwon, Y. D. and Kim, D. Y.** (2016). Role of Teriparatide in Medication-Related Osteonecrosis of  
452 the Jaws (MRONJ). *Dent J (Basel)* **4**.

- 453 **Leder, B. Z.** (2017). Parathyroid Hormone and Parathyroid Hormone-Related Protein Analogs in  
454 Osteoporosis Therapy. *Curr Osteoporos Rep* **15**, 110-119.
- 455 **Lee, K. L., Guevarra, M. D., Nguyen, A. M., Chua, M. C., Wang, Y. and Jacobs, C. R.** (2015). The  
456 primary cilium functions as a mechanical and calcium signaling nexus. *Cilia* **4**, 7.
- 457 **Lin, T. L. and Matsui, W.** (2012). Hedgehog pathway as a drug target: Smoothened inhibitors in  
458 development. *Onco Targets Ther* **5**, 47-58.
- 459 **Livak, K. J. and Schmittgen, T. D.** (2001). Analysis of relative gene expression data using real-  
460 time quantitative PCR and the 2<sup>-Delta Delta C(T)</sup> Method. *Methods* **25**, 402-8.
- 461 **Lu, Y. and Feng, J. Q.** (2011). FGF23 in skeletal modeling and remodeling. *Curr Osteoporos Rep* **9**,  
462 103-8.
- 463 **Malone, A. M., Anderson, C. T., Tummala, P., Kwon, R. Y., Johnston, T. R., Stearns, T. and**  
464 **Jacobs, C. R.** (2007). Primary cilia mediate mechanosensing in bone cells by a calcium-independent  
465 mechanism. *Proc Natl Acad Sci U S A* **104**, 13325-30.
- 466 **Millington, G., Elliott, K. H., Chang, Y. T., Chang, C. F., Dlugosz, A. and Brugmann, S. A.** (2017).  
467 Cilia-dependent GLI processing in neural crest cells is required for tongue development. *Dev Biol* **424**,  
468 124-137.
- 469 **Mina, M., Havens, B. and Velonis, D. A.** (2007). FGF signaling in mandibular skeletogenesis.  
470 *Orthod Craniofac Res* **10**, 59-66.
- 471 **Monsen, E. R.** (1989). The 10th edition of the Recommended Dietary Allowances: what's new in  
472 the 1989 RDAs? *J Am Diet Assoc* **89**, 1748-52.
- 473 **Motch Perrine, S. M., Wu, M., Stephens, N. B., Kriti, D., van Bakel, H., Jabs, E. W. and**  
474 **Richtsmeier, J. T.** (2019). Mandibular dysmorphology due to abnormal embryonic osteogenesis in  
475 FGFR2-related craniosynostosis mice. *Disease Models & Mechanisms* **12**.
- 476 **Neugebauer, J. M., Amack, J. D., Peterson, A. G., Bisgrove, B. W. and Yost, H. J.** (2009). FGF  
477 signalling during embryo development regulates cilia length in diverse epithelia. *Nature* **458**, 651-4.
- 478 **Perlyn, C. A., Schmelzer, R. E., Sutura, S. P., Kane, A. A., Govier, D. and Marsh, J. L.** (2002).  
479 Effect of distraction osteogenesis of the mandible on upper airway volume and resistance in children  
480 with micrognathia. *Plast Reconstr Surg* **109**, 1809-18.
- 481 **Plotnikova, O. V., Pugacheva, E. N. and Golemis, E. A.** (2009). Primary cilia and the cell cycle.  
482 *Methods Cell Biol* **94**, 137-60.
- 483 **Rayman, S., Almas, K. and Dincer, E.** (2009). Bisphosphonate-related jaw necrosis: a team  
484 approach management and prevention. *Int J Dent Hyg* **7**, 90-5.
- 485 **Reiter, J. F. and Leroux, M. R.** (2017). Genes and molecular pathways underpinning ciliopathies.  
486 *Nat Rev Mol Cell Biol* **18**, 533-547.
- 487 **Ryley, J. F.** (1968). Chick embryo infections for the evaluation of anticoccidial drugs. *Parasitology*  
488 **58**, 215-20.
- 489 **Sasai, N. and Briscoe, J.** (2012). Primary cilia and graded Sonic Hedgehog signaling. *Wiley*  
490 *Interdiscip Rev Dev Biol* **1**, 753-72.
- 491 **Saternos, H., Ley, S. and AbouAlaiwi, W.** (2020). Primary Cilia and Calcium Signaling  
492 Interactions. *Int J Mol Sci* **21**.
- 493 **Satterwhite, J., Heathman, M., Miller, P. D., Marin, F., Glass, E. V. and Dobnig, H.** (2010).  
494 Pharmacokinetics of teriparatide (rhPTH[1-34]) and calcium pharmacodynamics in postmenopausal  
495 women with osteoporosis. *Calcif Tissue Int* **87**, 485-92.
- 496 **Scales, S. J. and de Sauvage, F. J.** (2009). Mechanisms of Hedgehog pathway activation in cancer  
497 and implications for therapy. *Trends Pharmacol Sci* **30**, 303-12.
- 498 **Schock, E. N., Chang, C. F., Struve, J. N., Chang, Y. T., Chang, J., Delany, M. E. and Brugmann, S.**  
499 **A.** (2015). Using the avian mutant talpid(2) as a disease model for understanding the oral-facial  
500 phenotypes of oral-facial-digital syndrome. *Disease Models & Mechanisms* **8**, 855-U547.

501 **Shigetani, Y., Nobusada, Y. and Kuratani, S.** (2000). Ectodermally derived FGF8 defines the  
502 maxillomandibular region in the early chick embryo: epithelial-mesenchymal interactions in the  
503 specification of the craniofacial ectomesenchyme. *Dev Biol* **228**, 73-85.

504 **Silva, B. C. and Bilezikian, J. P.** (2015). Parathyroid hormone: anabolic and catabolic actions on  
505 the skeleton. *Curr Opin Pharmacol* **22**, 41-50.

506 **Sim, I. W., Borromeo, G. L., Tsao, C., Hardiman, R., Hofman, M. S., Papatziamos Hjelle, C.,**  
507 **Siddique, M., Cook, G. J. R., Seymour, J. F. and Ebeling, P. R.** (2020). Teriparatide Promotes Bone  
508 Healing in Medication-Related Osteonecrosis of the Jaw: A Placebo-Controlled, Randomized Trial. *J Clin*  
509 *Oncol* **38**, 2971-2980.

510 **Tabler, J. M., Barrell, W. B., Szabo-Rogers, H. L., Healy, C., Yeung, Y., Perdiguero, E. G., Schulz,**  
511 **C., Yannakoudakis, B. Z., Mesbahi, A., Wlodarczyk, B. et al.** (2013). Fuz mutant mice reveal shared  
512 mechanisms between ciliopathies and FGF-related syndromes. *Dev Cell* **25**, 623-35.

513 **Takashi, Y., Sawatsubashi, S., Endo, I., Ohnishi, Y., Abe, M., Matsuhisa, M., Kawanami, D.,**  
514 **Matsumoto, T. and Fukumoto, S.** (2021). Skeletal FGFR1 signaling is necessary for regulation of serum  
515 phosphate level by FGF23 and normal life span. *Biochem Biophys Res* **27**, 101107.

516 **Terao, F., Takahashi, I., Mitani, H., Haruyama, N., Sasano, Y., Suzuki, O. and Takano-**  
517 **Yamamoto, T.** (2011). Fibroblast growth factor 10 regulates Meckel's cartilage formation during early  
518 mandibular morphogenesis in rats. *Dev Biol* **350**, 337-47.

519 **Tomonari, H., Takada, H., Hamada, T., Kwon, S., Sugiura, T. and Miyawaki, S.** (2017).  
520 Micrognathia with temporomandibular joint ankylosis and obstructive sleep apnea treated with  
521 mandibular distraction osteogenesis using skeletal anchorage: a case report. *Head Face Med* **13**, 20.

522 **Tsai, J. N., Lee, H., David, N. L., Eastell, R. and Leder, B. Z.** (2019). Combination denosumab and  
523 high dose teriparatide for postmenopausal osteoporosis (DATA-HD): a randomised, controlled phase 4  
524 trial. *Lancet Diabetes Endocrinol* **7**, 767-775.

525 **Wallingford, J. B. and Mitchell, B.** (2011). Strange as it may seem: the many links between Wnt  
526 signaling, planar cell polarity, and cilia. *Genes Dev* **25**, 201-13.

527 **Waters, A. M. and Beales, P. L.** (2011). Ciliopathies: an expanding disease spectrum. *Pediatr*  
528 *Nephrol* **26**, 1039-56.

529 **Xiao, Z., Huang, J., Cao, L., Liang, Y., Han, X. and Quarles, L. D.** (2014). Osteocyte-specific  
530 deletion of *Fgfr1* suppresses FGF23. *PLoS One* **9**, e104154.

531 **Xie, Y., Su, N., Yang, J., Tan, Q., Huang, S., Jin, M., Ni, Z., Zhang, B., Zhang, D., Luo, F. et al.**  
532 (2020). FGF/FGFR signaling in health and disease. *Signal Transduct Target Ther* **5**, 181.

533 **Yu, W. and Su, J.** (2020). The effects of different doses of teriparatide on bisphosphonate-  
534 related osteonecrosis of the jaw in mice. *Oral Dis* **26**, 609-620.

535 **Yuan, X., Liu, M., Cao, X. and Yang, S.** (2019). Ciliary IFT80 regulates dental pulp stem cells  
536 differentiation by FGF/FGFR1 and Hh/BMP2 signaling. *Int J Biol Sci* **15**, 2087-2099.

537 **Zhang, Z., Wlodarczyk, B. J., Niederreither, K., Venugopalan, S., Florez, S., Finnell, R. H. and**  
538 **Amendt, B. A.** (2011). Fuz regulates craniofacial development through tissue specific responses to  
539 signaling factors. *PLoS One* **6**, e24608.

540 **Zhou, X., Pu, D., Liu, R., Li, X., Wen, X., Zhang, L., Chen, L., Deng, M. and Liu, L.** (2013). The  
541 *Fgfr2*(S252W/+) mutation in mice retards mandible formation and reduces bone mass as in human Apert  
542 syndrome. *Am J Med Genet A* **161A**, 983-92.

543 **Zosen, D., Hadera, M. G., Lumor, J. S., Andersen, J. M. and Paulsen, R. E.** (2021). Chicken  
544 embryo as animal model to study drug distribution to the developing brain. *J Pharmacol Toxicol*  
545 *Methods* **112**, 107105.

546 **Zuniga, J., Fuenzalida, M., Guerrero, A., Illanes, J., Dabancens, A., Diaz, E. and Lemus, D.**  
547 (2003). Effects of steroidal and non steroidal drugs on the neovascularization response induced by  
548 tumoral TA3 supernatant on CAM from chick embryo. *Biol Res* **36**, 233-40.

549

550

551

552

553

554

555

556

557

558

559

560

561

562

563

564

565

566

567 **Figure 1.  $ta^2$  mandibles and kidneys have aberrant *FGF23*, *KLOTHO* and *PTH* expression.** (A, B)  
568 Alizarin Red stained transverse sections of HH39 control<sup>+/+</sup> and  $ta^2$  mandibles (n=3 per group). (C, D) DAPI  
569 stained sagittal sections of HH39 control<sup>+/+</sup> and  $ta^2$  kidneys (white asterisks denote the presence of cystic  
570 tubules). (E) Schematic of the FGF23-PTH axis in normal embryonic development and (E') the  
571 hypothesized axis in  $ta^2$  embryos. (F, G) RNAscope *in situ* hybridization for *KLOTHO* (magenta) and *PTH*  
572 (yellow) in control<sup>+/+</sup> and  $ta^2$  HH39 kidney sagittal sections, nuclei counterstained for DAPI (cyan). (H, I)  
573 DAPI stained frontal sections of HH39 control<sup>+/+</sup> and  $ta^2$  mandible, showing the Meckel's cartilage (MC), the  
574 angular (AN) and surangular (SA) bones. Dotted white box indicates the region of high magnification in (J,  
575 K) higher magnification pictures were taken. (J, K) RNAscope *in situ* hybridization for *FGF23* (magenta)  
576 and *PTH* (yellow) transcripts in control<sup>+/+</sup> and  $ta^2$  HH39 mandibular frontal sections, nuclei counterstained  
577 for DAPI (cyan). (L) qRT-PCR quantification of *FGF23* ( $p = 0.0016$ ) and *PTH* ( $p < 0.0001$ ) in control<sup>+/+</sup> and  
578  $ta^2$  HH39 mandibles (n=3 per group). (M) Quantification of serum calcium by HPLC of control<sup>+/+</sup> and  $ta^2$   
579 embryos ( $p = 0.0017$ ) at HH39 (n= 3 per group). Scale bars: (A-B) 1cm (C-D) 100 $\mu$ m (F-G) 20 $\mu$ m (H-I)  
580 100 $\mu$ m and (J-L) 20 $\mu$ m.

581

582 **Figure 2. Overactive FGF signaling can be modulated with AZD4547.** (A) qRT-PCR for *FGFR2* and  
583 *SPRY2* at HH34; *FGFR1* and *SPRY2* at HH39 (\* $p < 0.05$ ; n=4). (B) Schematic of AZD4547 mechanism. (C)  
584 Schematic of the experimental design for AZD4547 treatment. (D-F) Alizarin Red staining in HH39 ctrl<sup>+/+</sup>,  
585  $ta^2$  and  $ta^2$  + AZD4547 treated embryos (n=4 for each group). (G) Measurements of the mandibular length  
586 of the groups depicted in D-F (\* $p = 0.0174$ ; \*\* $p = 0.0084$ ). (H) qRT-PCR quantification for *SPRY2*

587 transcripts in the three experimental groups (\*p < 0.05; n=3 per group). Data are mean±s.d. (A) Unpaired  
588 one-tailed Student's t-test. (G-H) Ordinary one-way ANOVA. n.s, not significant. Scale bars: 2.5cm.

589

590 **Figure 3. AZTeri treatment in the *ta*<sup>2</sup> mandible.** (A) Schematic of the experimental design for AZTeri  
591 treatment. (B-D) RNAscope *in situ* hybridization for *SPRY2* (green) in ctrl<sup>+/+</sup>, *ta*<sup>2</sup> and *ta*<sup>2</sup> + AZTeri transverse  
592 mandibular sections (n=4 per group). (E) qRT-PCR quantification for *SPRY2* transcripts in the three  
593 experimental groups (n=4 per group). (F) Western blot for phosphorylated-ERK and total ERK, and  
594 quantification of pERK/Vinculin ratio in non-injected ctrl<sup>+/+</sup>, *ta*<sup>2</sup> and *ta*<sup>2</sup> + AZTeri embryos at HH34 (n=3 per  
595 group). Nuclei counterstained for DAPI (magenta). MC: Meckel's cartilage. Data are mean±s.d. \*P<0.05  
596 (Ordinary one-way ANOVA). n.s, not significant. Scale bars: 200µm.

597

598 **Figure 4. AZTeri treatment alleviates the micrognathic phenotype in *ta*<sup>2</sup> embryos.** (A-C) Alizarin Red  
599 stained heads at HH39 of ctrl<sup>+/+</sup>, *ta*<sup>2</sup> and *ta*<sup>2</sup> + AZTeri embryos (n=3 for each group). (D) Measurements of  
600 the mandibular length of ctrl<sup>+/+</sup>, *ta*<sup>2</sup> and *ta*<sup>2</sup> + AZTeri embryos (\*p= 0.0199; \*\*p= 0.0040; \*\*\*p= 0.0002). (E-G)  
601 Von Kossa staining in transverse sections of ctrl<sup>+/+</sup>, *ta*<sup>2</sup> and *ta*<sup>2</sup> + AZTeri HH39 mandibles (n= 4 per group).  
602 (H) Area quantification of Von Kossa stained HH39 mandibular sections (\*p< 0.05). (I-K) TRAP staining in  
603 transverse sections of ctrl<sup>+/+</sup>, *ta*<sup>2</sup> and *ta*<sup>2</sup> + AZTeri HH39 mandibles (n= 4 per group). (L) Quantification of  
604 serum calcium by HPLC of ctrl<sup>+/+</sup>, *ta*<sup>2</sup> and *ta*<sup>2</sup> + AZTeri HH39 embryos (\*\*p< 0.05; n=3 per group). (M-O)  
605 RNAscope *in situ* hybridization for *PTH* (yellow) in ctrl<sup>+/+</sup>, *ta*<sup>2</sup> and *ta*<sup>2</sup> + AZTeri HH39 mandibular frontal  
606 sections (n=3 per group). (P-R) RNAscope *in situ* hybridization for *SPP1* transcripts (magenta) in ctrl<sup>+/+</sup>, *ta*<sup>2</sup>  
607 and *ta*<sup>2</sup> + AZTeri HH39 mandibular frontal sections (n=3 per group). Data are mean±s.d. (ordinary one-way  
608 ANOVA). n.s, not significant. Scale bars: (A-C) 2.5cm, (E-G) 200µm, (I-L) 50µm and (N-S) 20µm.



609

610 **Supplementary Figure 1.** (A) Dose response curve of AZD4547 treatment. X-axis represents drug  
611 concentration ( $\mu\text{M}$ ) and Y-axis represents the mortality rate (%) of total embryos treated. (B) Dose  
612 response curve of Teriparatide Acetate treatment. X-axis represents the drug concentration ( $\mu\text{M}$ ) and Y-  
613 axis represents the mortality rate (%) of total embryos treated. Yellow-dashed line shows the 50% mortality  
614 rate, and the red-dashed line represents the chosen concentration. (C) Table containing the number of  
615 embryos treated for each drug concentration of AZD4547 and Teriparatide Acetate.

616

617 **Supplementary Figure 2.** (A) Schematic of the mechanism of action for Teriparatide Acetate. (B)  
618 Experimental design for Teriparatide Acetate treatment. (C-E) HH39 Alizarin Red stained heads of  $\text{ctrl}^{+/+}$ ,  
619  $ta^2$  and  $ta^2$  + Teriparatide Acetate embryos ( $n=3$  for each group). (F) Measurements of the mandibular  
620 length of the groups depicted in C-E ( $p > 0.05$ ). Data are mean $\pm$ s.d. (ordinary one-way ANOVA). n.s, not  
621 significant. Scale bars: 2.5cm (C-E).

622

623 **Supplementary Figure 3.** (A) Western blot for phosphorilated-ERK and total ERK, and quantification of  
624 pERK/Vinculin ratio in  $\text{ctrl}^{+/+}$  and  $\text{ctrl}^{+/+}$  + AZTeri embryos at HH34 ( $n=3$  per group). Data are mean $\pm$ s.d.  
625 \* $P < 0.05$  (unpaired one-tailed Student's t-test).

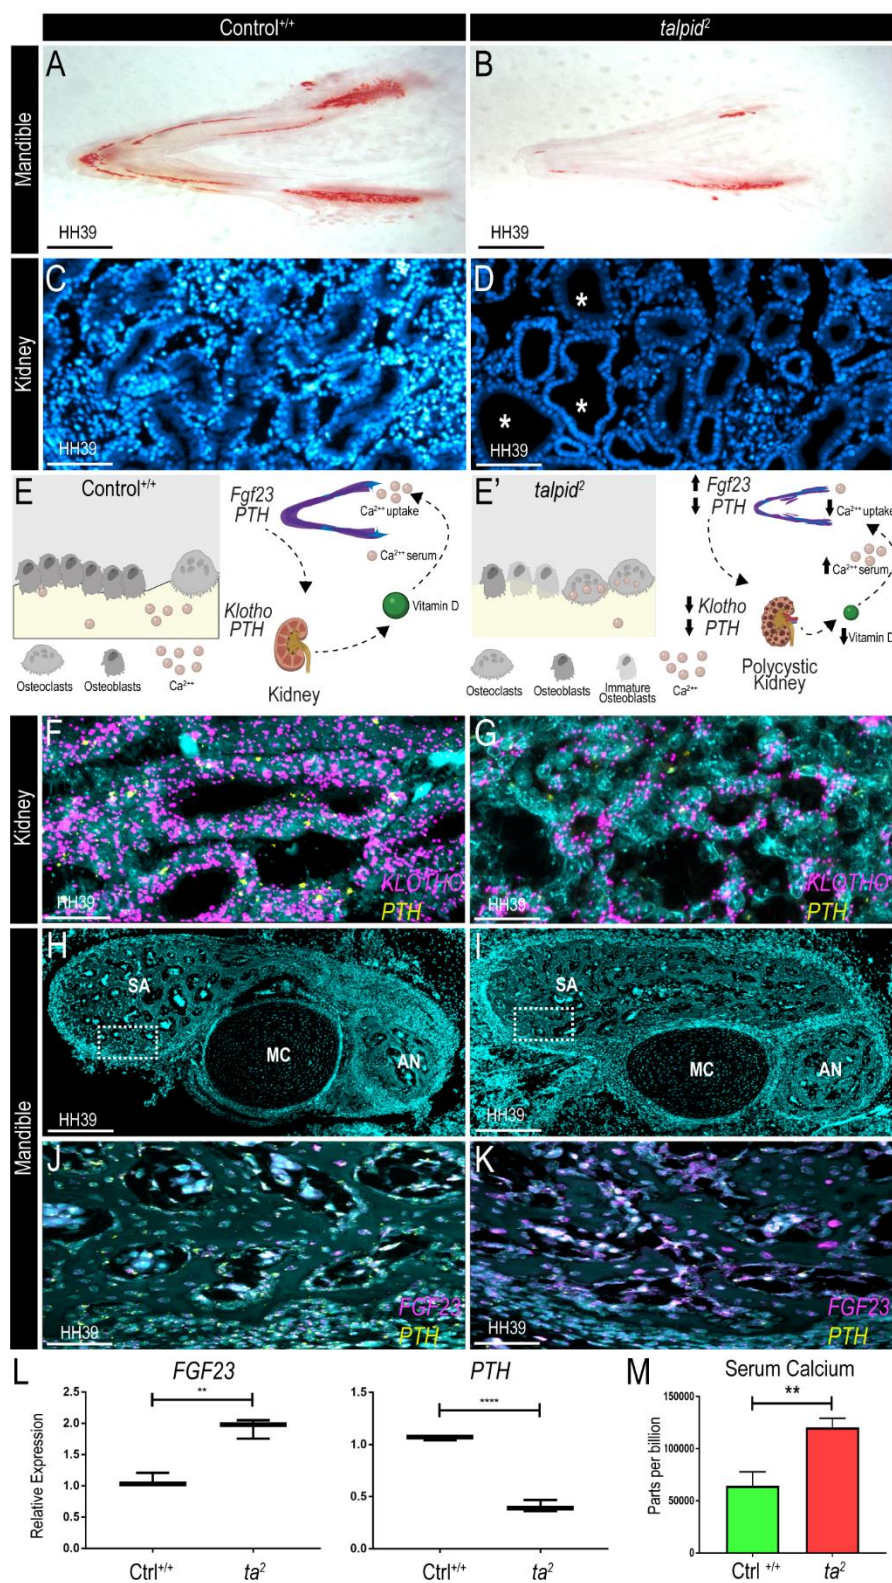

**Figure 1. *ta<sup>2</sup>* mandibles and kidneys have aberrant *FGF23*, *KLOTHO* and *PTH* expression.** (A, B) Alizarin Red stained transverse sections of HH39 control<sup>+/+</sup> and *ta<sup>2</sup>* mandibles (n=3 per group). (C, D) DAPI stained

sagittal sections of HH39 control<sup>+/+</sup> and *ta*<sup>2</sup> kidneys (white asterisks denote the presence of cystic tubules). (E) Schematic of the FGF23-PTH axis in normal embryonic development and (E') the hypothesized axis in *ta*<sup>2</sup> embryos. (F, G) RNAscope *in situ* hybridization for *KLOTHO* (magenta) and *PTH* (yellow) in control<sup>+/+</sup> and *ta*<sup>2</sup> HH39 kidney sagittal sections, nuclei counterstained for DAPI (cyan). (H, I) DAPI stained frontal sections of HH39 control<sup>+/+</sup> and *ta*<sup>2</sup> mandible, showing the Meckel's cartilage (MC), the angular (AN) and surangular (SA) bones. Dotted white box indicates the region of high magnification in (J, K) higher magnification pictures were taken. (J, K) RNAscope *in situ* hybridization for *FGF23* (magenta) and *PTH* (yellow) transcripts in control<sup>+/+</sup> and *ta*<sup>2</sup> HH39 mandibular frontal sections, nuclei counterstained for DAPI (cyan). (L) qRT-PCR quantification of *FGF23* ( $p = 0.0016$ ) and *PTH* ( $p < 0.0001$ ) in control<sup>+/+</sup> and *ta*<sup>2</sup> HH39 mandibles (n=3 per group). (M) Quantification of serum calcium by HPLC of control<sup>+/+</sup> and *ta*<sup>2</sup> embryos ( $p = 0.0017$ ) at HH39 (n=3 per group). Scale bars: (A-B) 1cm (C-D) 100 $\mu$ m (F-G) 20 $\mu$ m (H-I) 100 $\mu$ m and (J-L) 20 $\mu$ m.

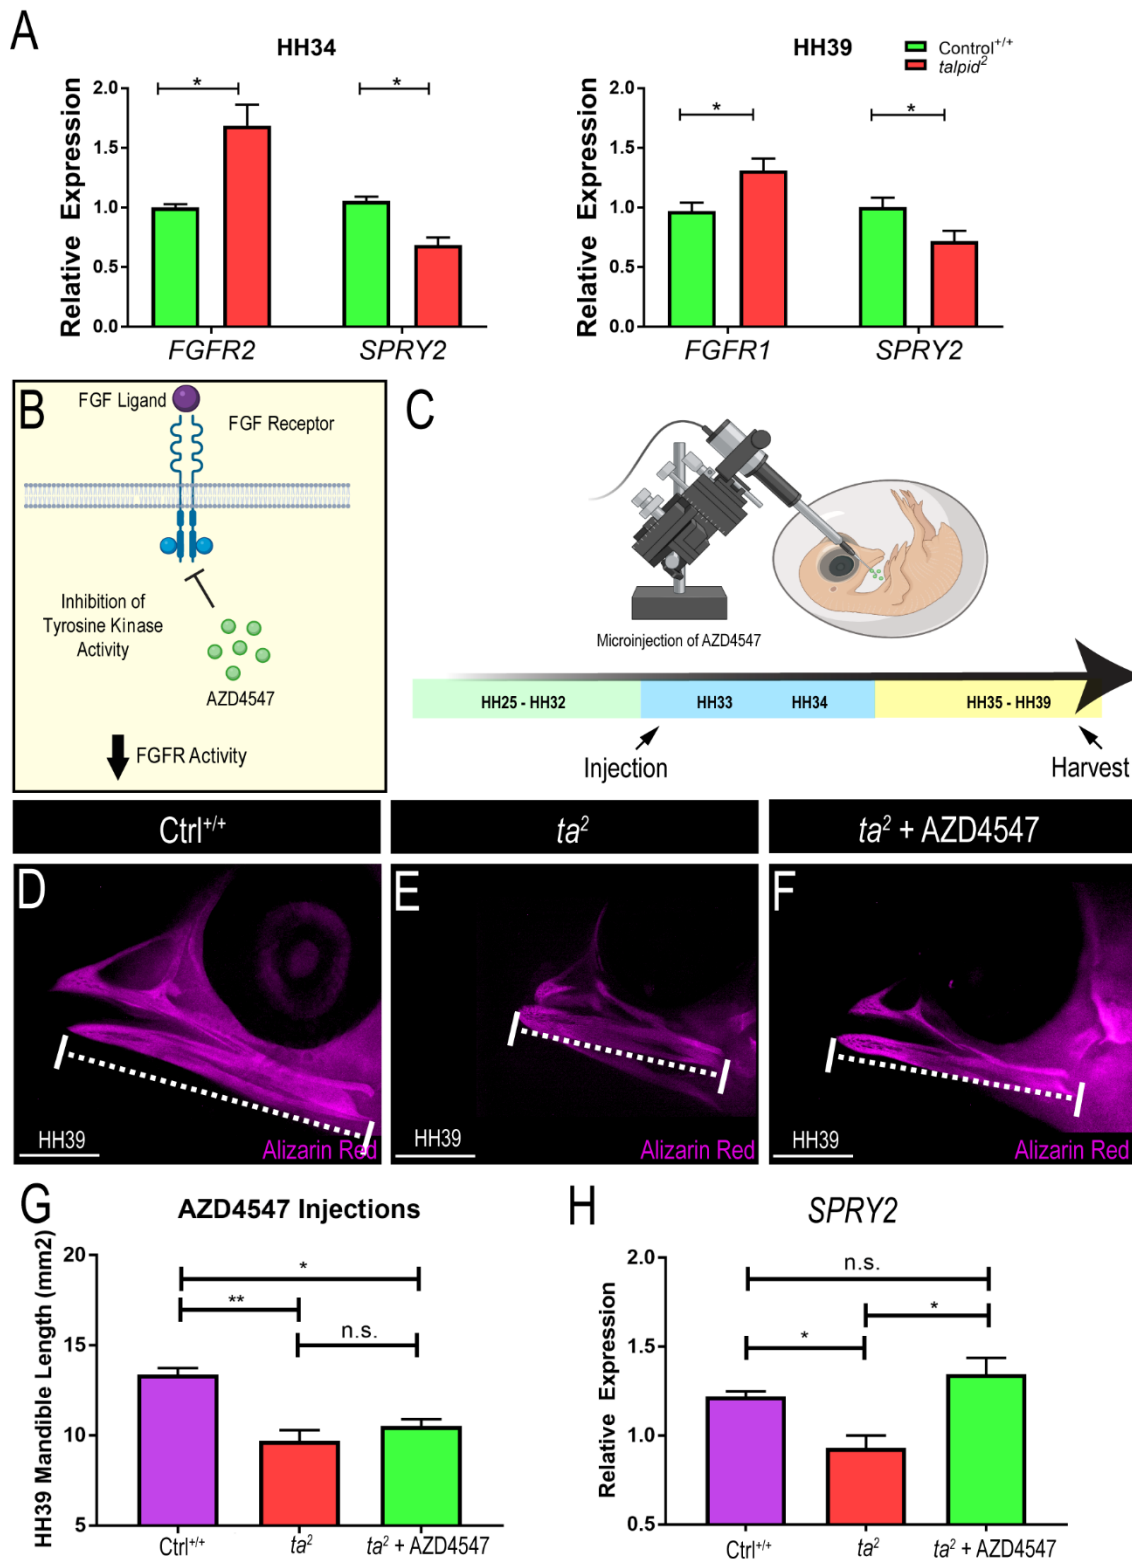

**Figure 2. Overactive FGF signaling can be modulated with AZD4547. (A)** qRT-PCR for *FGFR2* and *SPRY2* at HH34; *FGFR1* and *SPRY2* at HH39 (\* $p < 0.05$ ;  $n = 4$ ). (B) Schematic of AZD4547 mechanism. (C)

Schematic of the experimental design for AZD4547 treatment. (D-F) Alizarin Red staining in HH39 ctrl<sup>+/+</sup>, *ta*<sup>2</sup> and *ta*<sup>2</sup> + AZD4547 treated embryos (n=4 for each group). (G) Measurements of the mandibular length of the groups depicted in D-F (\*p = 0.0174; \*\*p = 0.0084). (H) qRT-PCR quantification for *SPRY2* transcripts in the three experimental groups (\*p < 0.05; n=3 per group). Data are mean±s.d. (A) Unpaired one-tailed Student's t-test. (G-H) Ordinary one-way ANOVA. n.s, not significant. Scale bars: 2.5cm.



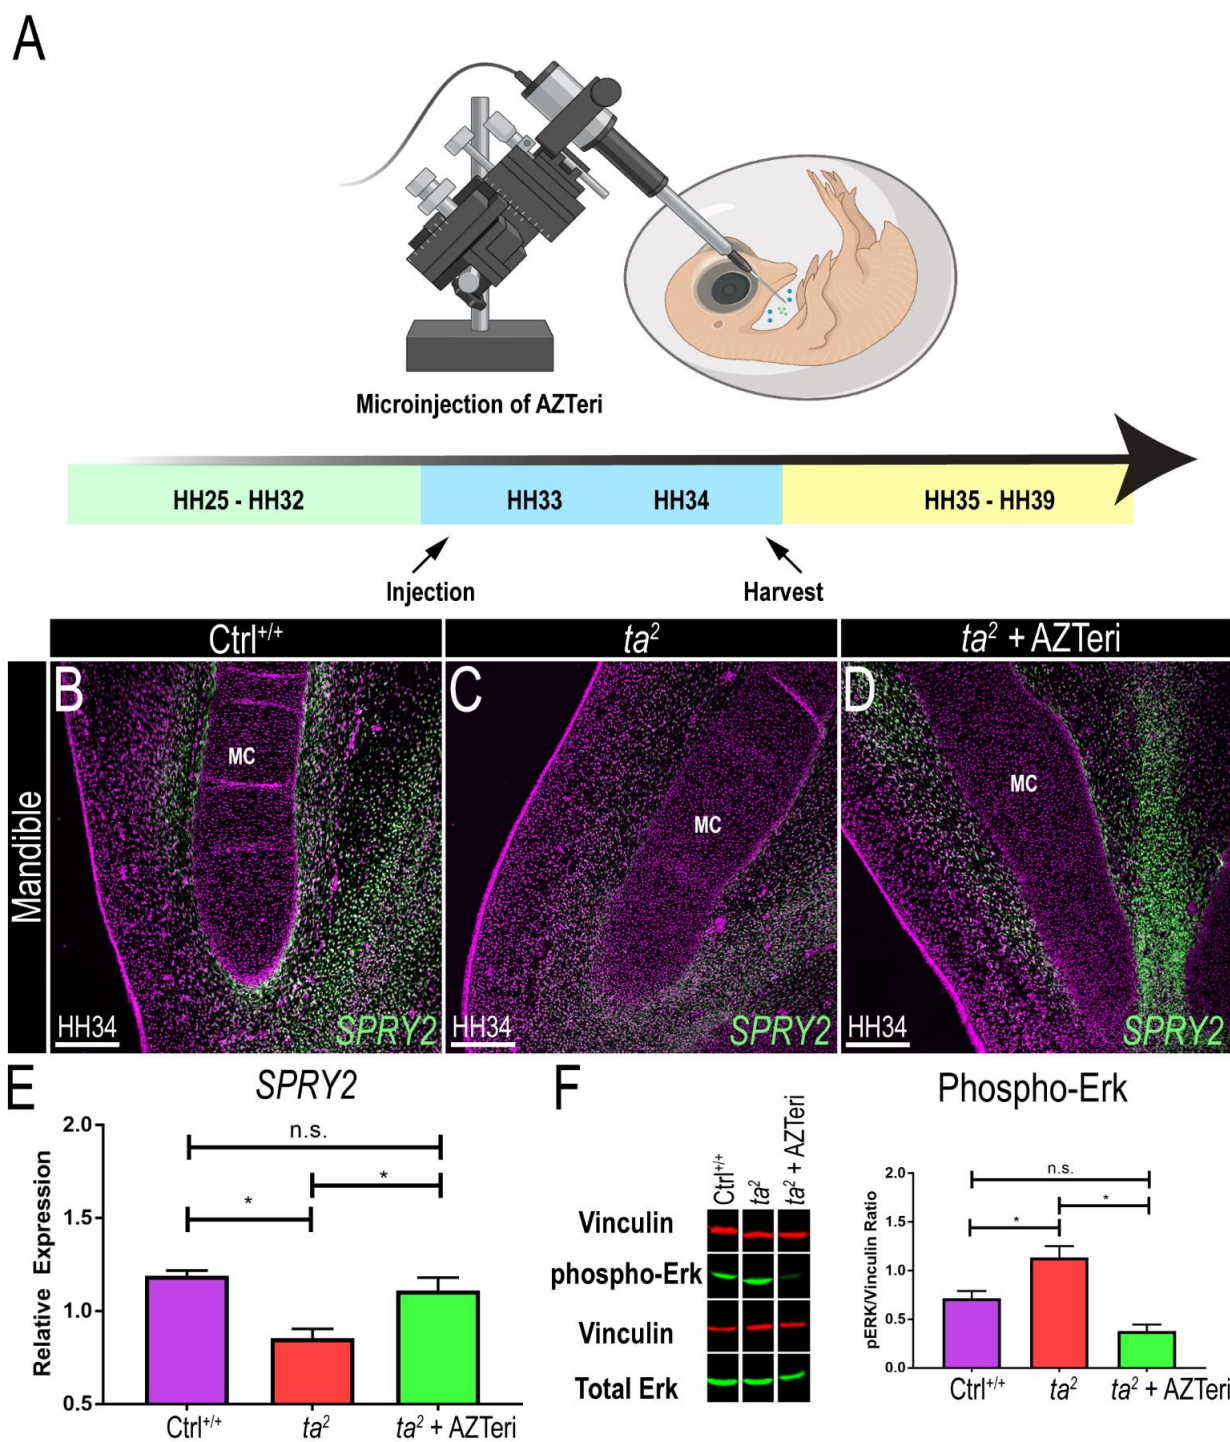

**Figure 3. AZTeri treatment in the *ta*<sup>2</sup> mandible.** (A) Schematic of the experimental design for AZTeri treatment. (B-D) RNA scope *in situ* hybridization for *SPRY2* (green) in ctrl<sup>+/+</sup>, *ta*<sup>2</sup> and *ta*<sup>2</sup> + AZTeri transverse mandibular sections (n=4 per group). (E) qRT-PCR quantification for *SPRY2* transcripts in the three

experimental groups (n=4 per group). (F) Western blot for phosphorylated-ERK and total ERK, and quantification of pERK/Vinculin ratio in non-injected ctrl<sup>+/+</sup>, *ta*<sup>2</sup> and *ta*<sup>2</sup> + AZTeri embryos at HH34 (n=3 per group). Nuclei counterstained for DAPI (magenta). MC: Meckel's cartilage. Data are mean±s.d. \*P<0.05 (Ordinary one-way ANOVA). n.s, not significant. Scale bars: 200µm.

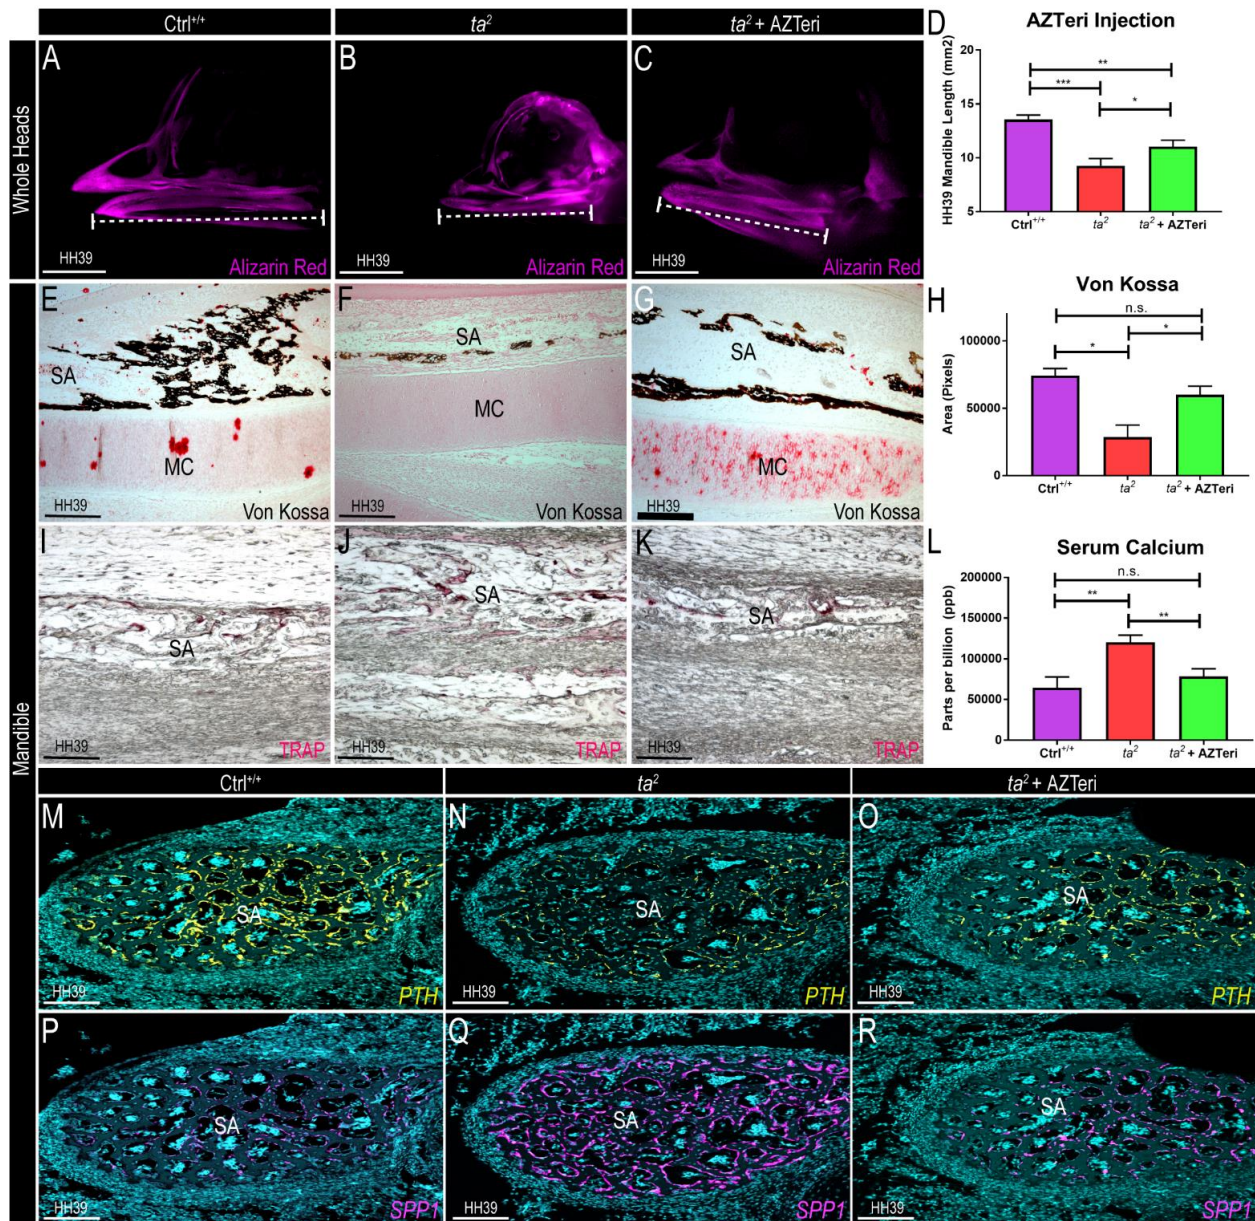

**Figure 4. AZTeri treatment alleviates the micrognathic phenotype in *ta<sup>2</sup>* embryos.** (A-C) Alizarin Red stained heads at HH39 of ctrl<sup>+/+</sup>, *ta<sup>2</sup>* and *ta<sup>2</sup>* + AZTeri embryos (n=3 for each group). (D) Measurements of the mandibular length of ctrl<sup>+/+</sup>, *ta<sup>2</sup>* and *ta<sup>2</sup>* + AZTeri embryos (\*p= 0.0199; \*\*p= 0.0040; \*\*\*p= 0.0002). (E-G) Von Kossa staining in transverse sections of ctrl<sup>+/+</sup>, *ta<sup>2</sup>* and *ta<sup>2</sup>* + AZTeri HH39 mandibles (n= 4 per group). (H) Area quantification of Von Kossa stained HH39 mandibular sections (\*p< 0.05). (I-K) TRAP staining in transverse sections of ctrl<sup>+/+</sup>, *ta<sup>2</sup>* and *ta<sup>2</sup>* + AZTeri HH39 mandibles (n= 4 per group). (L) Quantification of serum calcium by HPLC of ctrl<sup>+/+</sup>, *ta<sup>2</sup>* and *ta<sup>2</sup>* + AZTeri HH39 embryos (\*\*p< 0.05; n=3 per group). (M-O)



RNAscope *in situ* hybridization for *PTH* (yellow) in ctrl<sup>+/+</sup>, *ta*<sup>2</sup> and *ta*<sup>2</sup> + AZTeri HH39 mandibular frontal sections (n=3 per group). (P-R) RNAscope *in situ* hybridization for *SPP1* transcripts (magenta) in ctrl<sup>+/+</sup>, *ta*<sup>2</sup> and *ta*<sup>2</sup> + AZTeri HH39 mandibular frontal sections (n=3 per group). Data are mean±s.d. (ordinary one-way ANOVA). n.s, not significant. Scale bars: (A-C) 2.5cm, (E-G) 200µm, (I-L) 50µm and (N-S) 20µm.
